# Supplementary material
Source: PubMed Central journal article supplement (PMC7653589)
Supplement: ajtr0012-6879-f6.pdf [file ajtr0012-6879-f6.pdf]

EPS induced mitophagy increasing FUNDC1 through AMPK-ULK1

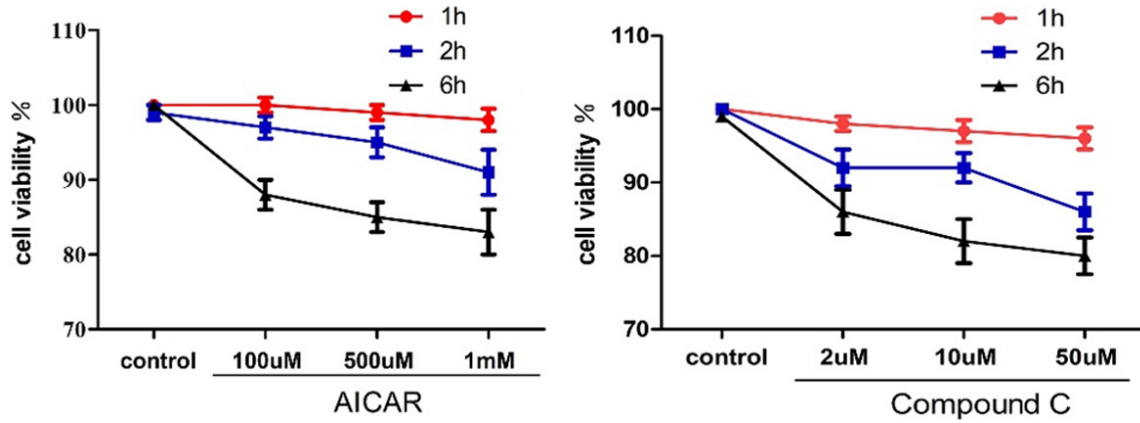

Supplementary Figure 1. The effects of AICAR and Compound C at different concentrations with different periods of exposure on the viability of C2C12 cells as assessed by the MTT assay.

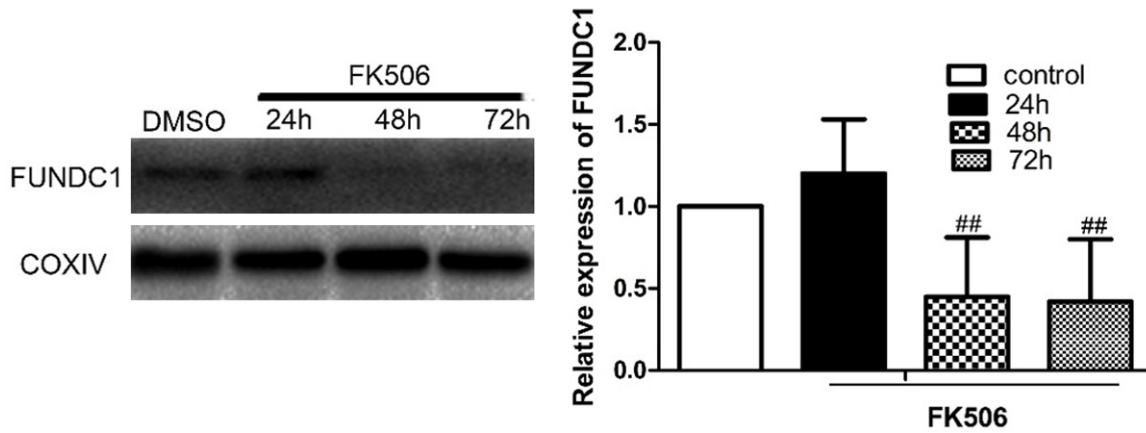

Supplementary Figure 2. Western blotting of the PGAM5 and FUNDC1 levels in C2C12 cells treated with 6 μM FK506 for 24, 48 or 72 h. The values presented are means ± SD (n=6). ##P<0.01 in comparison to the control DMSO group.

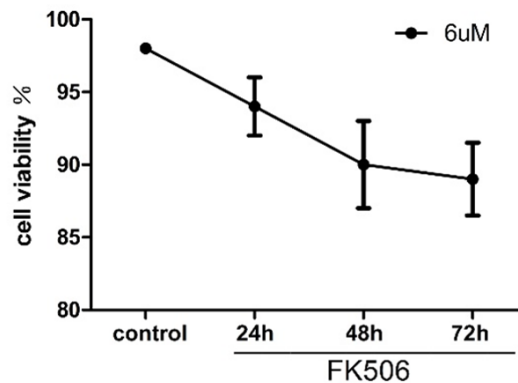

Supplementary Figure 3. Incubation of C2C12 cells with 6 μM FK506 for as long as 72 h has little effect on cell viability as assessed by the MTT assay.
